after two years, and thoracoscopic dissection (n=56) was introduced after case 94. Laparoscopic TARC was performed for the last 47 patients. Patients in the four groups had similar demographics, histological diagnosis, pre-operative and pathological staging, although the ones in the lap TARC group had a lower uptake of neo-adjuvant chemotherapy (64% versus 83%), mainly due to patient choice and co-morbidities.

Specimen lymph nodes for the four groups were: open = 20.5 +/-9.5; Lap = 19.5 +/- 7; mini-tho = 19.9 +/- 7; lap TARC = 25 +/- 10 (p = 0.027). Resection margins were >1mm in 68.1% (open), 67.3% (lap), 64.2 (mini-tho) and 79.5% (lap TARC). Patients five-year survival rates during the 4 phases of the learning curve were 38.6%, 44.9%, 42.8% and 59% respectively, showing a benefit trend towards the end of the learning curve (p=0.03, log Rank Test).

**Conclusion:** Laparoscopic Anatomical resection of cancers of the OJG requires a long learning curve. The evolution of performance and surgical technique through open and minimally invasive learning phases, along with the progress in oncological science, result in improved long-term survival.

#### References:

- Botha AJ, Odendaal W, Patel V et al. Total adventitial resection of the cardia: 'optimal local resection' for tumours of the oesophago-gastric junction. *Ann R Coll Surg Engl* 2011; 93: 608–614.
- Markar, S. R., Mackenzie, H., Lagergren, P., Hanna, G. B. & Lagergren, J. Surgical proficiency gain and survival after esophagectomy for cancer. *J. Clin. Oncol.* 34, 1528–1536 (2016).
- White A, Kucukak S, Lee DN. Ivor Lewis minimally invasive esophagectomy for esophageal cancer: An excellent operation that improves with experience. *J Thorac Cardiovasc Surg.* 2019 Feb;157 (2):783–789.

#### O187 ANASTOMOTIC TECHNIQUES AND ASSOCIATED MORBIDITY IN TOTAL MINIMALLY-INVASIVE TRANSTHORACIC ESOPHAGECTOMY – RESULTS FROM THE ESOBENCHMARK DATABASE

Schroeder W<sup>1</sup>, Raptis D<sup>2</sup>, Schmidt H<sup>2</sup>, Gisbertz S<sup>3</sup>, Moons J<sup>4</sup>, Asti E<sup>8</sup>, Luyer M<sup>9</sup>, Hoelscher A<sup>1</sup>, Schneider P<sup>2</sup>, van Berge Henegouwen M<sup>3</sup>, Nafteux P<sup>4</sup>, Nilsson M<sup>5</sup>, Räsänen J<sup>6</sup>, Palazzo F<sup>7</sup>, Mercer S<sup>12</sup>, Bonavina L<sup>8</sup>, Nieuwenhuijzen G<sup>9</sup>, Wijnhoven B<sup>10</sup>, Pattyn P<sup>11</sup>, Grimmering P<sup>13</sup>, Bruns C<sup>1</sup>, Gutschow C<sup>2</sup>

<sup>1</sup>Dep of General, Visceral and Cancer Surgery, University of Cologne,

<sup>2</sup>Department of General and Transplantation Surgery, University Hospital Zurich,

<sup>3</sup>Department of Surgery, Amsterdam UMC, location AMC, University of Amsterdam, Cancer Center Amsterdam,

<sup>4</sup>Department of Thoracic Surgery, University Ziekenhuis Leuven,

<sup>5</sup>Division of Surgery, CLINTEC, Karolinska Institutet, Stockholm,

<sup>6</sup>Department of General Thoracic and Esophageal Surgery, Helsinki University Hospital,

<sup>7</sup>Department of Surgery, Thomas Jefferson University, Philadelphia, PA,

<sup>8</sup>Department of Surgery, IRCCS Policlinico San Donato, University of Milan,

<sup>9</sup>Department of Surgery, Catharina Hospital, Eindhoven,

<sup>10</sup>Department of Surgery, Erasmus University Medical Center, Rotterdam,

<sup>11</sup>Department of Surgery, University Center Ghent,

<sup>12</sup>Department of Upper GI Surgery, Queen Alexandra Hospital, Portsmouth,

<sup>13</sup>Department of General, Visceral and Transplant Surgery, University Medical Center, Mainz

**Background:** Total minimally-invasive transthoracic esophagectomy (ttMIE) faces increasing application in surgical treatment of esophageal cancer. For esophago-gastric reconstruction, different anastomotic techniques are currently used, but their impact on postoperative anastomotic leakage and morbidity has not been investigated. The aim of this retrospective multicenter analysis was to describe anastomotic techniques used for ttMIE and to analyze the associated morbidity.

**Patients and Methods:** Patients were selected from a basic dataset, collected over a 5-year period from 13 international surgical high-volume centers. Endpoints were anastomotic leakage rate and postoperative morbidity in correlation to anastomotic techniques, measured by the CD classification and the Comprehensive Complication Index<sup>®</sup> (CCI).

**Results:** Five anastomotic techniques were identified in 966 patients after ttMIE: Intrathoracic end-to-side circular-stapled technique in 427 patients (double-stapling n=90, purse-string n=337), intrathoracic (n=109) or cervical (n=255) side-to-side linear-stapled, and cervical end-to-side hand-sewn (n=175). Leakage rates were similar in intrathoracic and cervical anastomoses (15.9% vs. 17.2%, P=0.601), but overall complications (56.7% vs. 63.7%, P=0.029) and median 90-day CCI (21 (IQR 0-36) vs. 29 (IQR 0-40), P=0.019) favored intrathoracic reconstructions. Leakage rates after intrathoracic end-to-side double-stapling (23.3%) and cervical end-to-side hand-sewn (25.1%) techniques were significantly higher compared with intrathoracic

side-to-side linear (15.6%), end-to-side purse-string (13.9%) and cervical side-to-side linear-stapled esophago-gastrostomies (11.8%) (P<0.001). Multivariable analysis confirmed anastomotic technique as independent predictor of leakage after ttMIE.

**Conclusion:** Results of this analysis present the current status of the technical evolution of ttMIE with anastomotic leakage as predominant surgical complication. However, technique-related morbidity requires cautious interpretation considering the long learning curve of this complex surgical procedure.

#### O190 THE EPIDEMIOLOGY OF ANTI-REFLUX SURGERY IN DENMARK 2000-2017: A NATIONWIDE REGISTRY-BASED POPULATION STUDY

Jonas Sanberg Ljungdahl<sup>1,2</sup>, Jesper Durup<sup>3</sup>, Kim Christian Houliand<sup>4,2</sup>

<sup>1</sup>Department of Surgery, Kolding Hospital, a part of Lillebaelt Hospital, Kolding, Denmark.

<sup>2</sup>Department of Regional Health Research, University of Southern Denmark, Odense, Denmark.

<sup>3</sup>Department of Surgery, Odense University Hospital, Odense, Denmark

<sup>4</sup>Department of Vascular Surgery, Kolding Hospital, a part of Lillebaelt Hospital, Kolding, Denmark.

**Aim:** The primary aim of this register-based study was to describe the utilization and development of anti-reflux surgery compared to use of proton-pump inhibitors from 2000-2017 in a nationwide population-based cohort.

**Background & Methods:** Treatment of GERD consists of anti-secretory drugs, mainly proton pump inhibitors (PPI), or anti-reflux surgery. Laparoscopic anti-reflux surgery is considered standard of care in surgical treatment of gastro-esophageal reflux disease<sup>1</sup> and with careful patient selection based on thorough preoperative workup<sup>2</sup>, symptom control and patient satisfaction are high compared to medical therapy<sup>3-5</sup>.

In American studies, the rate of anti-reflux surgery peaked at 16.7 per 100.000 inhabitants in 2000 and then decreased to 6.1 per 100.000 inhabitants by 2010<sup>6,7</sup>. The only Danish study on the epidemiology of anti-reflux surgery, describes a reoperation rate of 5%, but only includes data from 1997-2005 and describes no rate of surgery compared to population size<sup>8</sup>. It is therefore unclear how the use of anti-reflux surgery has developed.

This register-based cohort study includes all patients who have undergone anti-reflux surgery in Denmark from 2000-2017. Data was retrieved from The National Danish Patient Registry and linked at an individual level using the unique civil registration number issued to all Danes. For the entire study period, rate of anti-reflux surgery, including primary and reoperative procedures, Charlson comorbidity index (CCI), 30- and 90-days perioperative mortality, use of laparoscopic technique and length of stay was calculated. Population-based rates of surgery was compared to rates of PPI-use.

**Results:** Rate of surgery peaked between 2000-2005 with >5.0 procedures per 100.000 inhabitants, but declined consistently in the rest of the study period. Reoperations were an increasing percentage of the procedures with up to 20% increasing from 7%. CCI increased during the study period with >25% having a CCI>0 at the end of the study. In the entire period, >98% of procedures were performed laparoscopically, mortality <1% and length of stay declined to median 1 day.

**Conclusion:** Anti-reflux surgery was utilized less, but mortality, conversion rates and length of hospital stay were consistently low, despite an increased burden of comorbidity and reoperations.

#### References:

- Fuchs KH, Babic B, Breithaupt W, et al. EAES recommendations for the management of gastroesophageal reflux disease. *Surg Endosc Other Interv Tech.* 2014;28(6):1753-1773. doi:10.1007/s00464-014-3431-z
- Jobe BA, Richter JE, Hoppo T, et al. Preoperative diagnostic workup before antireflux surgery: an evidence and experience-based consensus of the Esophageal Diagnostic Advisory Panel. *J Am Coll Surg.* 2013;217(4):586-597. doi:10.1016/j.jamcollsurg.2013.05.023
- Rickenbacher N, Kotter T, Kochen MM, Scherer M, Blozik E. Fundoplication versus medical management of gastroesophageal reflux disease: systematic review and meta-analysis. *Surg Endosc.* 2014;28(1):143-155. doi:10.1007/s00464-013-3140-z
- Wileman SM, McCann S, Grant AM, Krukowski ZH, Bruce J. Medical versus surgical management for gastro-oesophageal reflux disease (GORD) in adults. In: *Cochrane Database of Systematic Reviews.* ; 2010. doi:10.1002/14651858.CD003243.pub2
